# Supplementary material
Source: PubMed Central journal article supplement (PMC2040920)

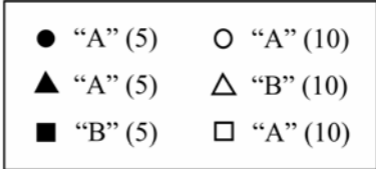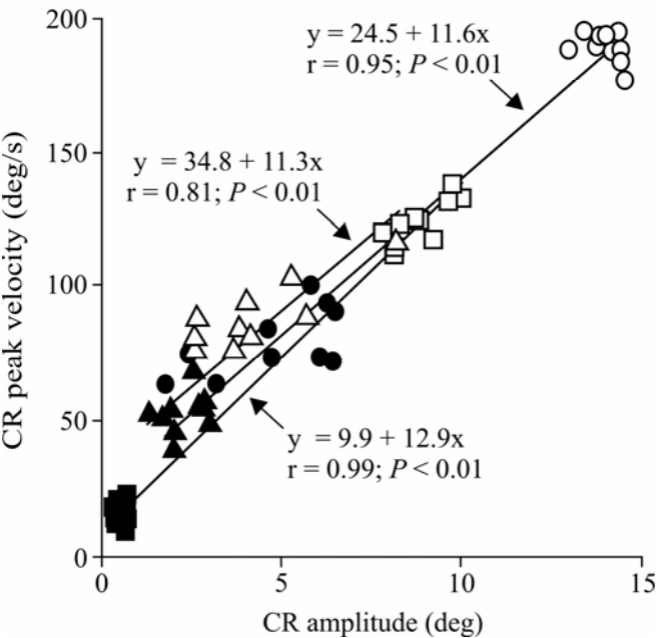

Supplement: pnas_0704548104_2.pdf [file pnas_0704548104_2.pdf]
